# Supplementary material for: Equine Polyclonal Antibodies Prevent Acute Chikungunya Virus Infection in Mice
Source: MDPI journal article supplement (doi:10.3390/v15071479), 2023-06-29
Supplement: s1 [file s1]

**Table S1.** Average number of plaques per duplicate well observed from serum samples collected from immunocompromised IFN $\alpha$  $\beta$ R<sup>-/-</sup> mice surviving to 21 days post CHIKV infection and calculated PRNT<sub>80</sub> titer.

| Group                  | Animal Cage    | Animal          | Dilution |      |      |       |       |       | PRNT <sub>80</sub> <sup>c</sup> |
|------------------------|----------------|-----------------|----------|------|------|-------|-------|-------|---------------------------------|
|                        | # <sup>a</sup> | ID <sup>b</sup> | 1:20     | 1:40 | 1:80 | 1:160 | 1:320 | 1:640 |                                 |
| 2 <sup>d</sup>         | 2M             | 1L              | 0        | 0    | 4    | 3     | 4     | 4     | 40                              |
|                        | 2M             | 1R              | 0        | 0    | 1    | 3     | 3     | 6     | 160                             |
|                        | 2M             | 2L              | 0        | 0    | 2    | 2     | 2     | 6     | 320                             |
|                        | 2M             | 1L2R            | 0        | 0    | 0    | 1     | 2     | 8     | 320                             |
|                        | 2M             | N               | 0        | 0    | 1    | 1     | 4     | 5     | 160                             |
|                        | 2F             | 1L              | 2        | 1    | 3    | 4     | 5     | 5     | 80                              |
|                        | 2F             | 1R              | 0        | 2    | 4    | 4     | 9     | 5     | 40                              |
|                        | 2F             | 2L              | 0        | 0    | 4    | 5     | 3     | 4     | 40                              |
|                        | 2F             | 1L2R            | 0        | 1    | 3    | 5     | 2     | 4     | 80                              |
|                        | 2F             | N               | 0        | 0    | 2    | 4     | 5     | 7     | 40                              |
| 3 <sup>e</sup>         | 3M             | 1R              | 0        | 0    | 1    | 2     | 5     | 6     | 160                             |
|                        | 3M             | 2L              | 0        | 0    | 1    | 4     | 3     | 5     | 80                              |
|                        | 3M             | 1L2R            | 0        | 0    | 1    | 1     | 5     | 7     | 160                             |
|                        | 3M             | N               | 0        | 1    | 1    | 1     | 3     | 3     | 320                             |
|                        | 3F             | 2L2R            | 0        | 0    | 0    | 0     | 3     | 7     | 320                             |
|                        | 3F             | 1R              | 1        | 2    | 2    | 2     | 4     | 7     | 160                             |
|                        | 3F             | 2L              | 0        | 2    | 3    | 6     | 9     | 8     | 80                              |
|                        | 3F             | 1L1R            | 0        | 1    | 1    | 1     | 6     | 5     | 160                             |
|                        | 3F             | N               | 0        | 1    | 2    | 3     | 11    | 8     | 160                             |
| Positive Mouse Control |                |                 | 0        | 1    | 2    | 4     | 3     | 7     | 80                              |
| Negative Mouse Control |                |                 | 7        | 11   | 13   | 13    | --    | --    | <20                             |

a All animals in cages with the suffix "M" were males, all animals in cages with the suffix "F" were females. b 1L = one left ear punch; 1R = one right ear punch; 2L = two left ear punches; 1L2R = one left ear punch and two right ear punches; N = no ear punches. c Defined as the reciprocal of the highest dilution where the average number of plaques per well did not exceed the calculated cut-off value of three plaques per well. d 100 mg/kg CHIKV-EIG qd X 5, i.p., beginning 5  $\pm$  1 h after infection. e 100 mg/kg CHIKV-EIG qd X 5, i.p., beginning 22  $\pm$  2 h after infection.

**Table S2.** Mean percent change in body weight from baseline in immunocompromised IFN $\alpha$  $\beta$ R<sup>-/-</sup> mice by study day, treatment group and gender.

| Study Day | Treatment Group | Gender        | Mean (95% Confidence Interval) |
|-----------|-----------------|---------------|--------------------------------|
| 1         | 1 <sup>a</sup>  | Female Only   | 1.83 (1.25, 2.41)              |
|           |                 | Male Only     | -3.76 (-5.37, -2.16)           |
|           |                 | Female + Male | -0.97 (-2.88, 0.95)            |
|           | 2 <sup>b</sup>  | Female Only   | 1.54 (-3.15, 6.23)             |
|           |                 | Male Only     | 0.65 (-1.49, 2.79)             |
|           |                 | Female + Male | 1.10 (-0.64, 2.83)             |
|           | 3 <sup>c</sup>  | Female Only   | -0.25 (-6.58, 6.08)            |
|           |                 | Male Only     | -2.8 (-6.8, 1.2)               |
|           |                 | Female + Male | -1.52 (-4.15, 1.11)            |
| 2         | 1               | Female Only   | 2.53 (-0.17, 5.23)             |
|           |                 | Male Only     | -4.41 (-6.63, -2.19)           |

|   |   |               |                        |
|---|---|---------------|------------------------|
| 3 | 2 | Female + Male | -0.94 (-3.49, 1.61)    |
|   |   | Female Only   | 2.27 (-0.63, 5.18)     |
|   |   | Male Only     | 2.03 (-3.37, 7.43)     |
|   | 3 | Female + Male | 2.15 (0.11, 4.19)      |
|   |   | Female Only   | -1.07 (-8.83, 6.7)     |
|   |   | Male Only     | -0.09 (-4.35, 4.17)    |
|   | 1 | Female + Male | -0.58 (-3.54, 2.39)    |
|   |   | Female Only   | -3.28 (-6.11, -0.45)   |
|   |   | Male Only     | -8.68 (-9.89, -7.48)   |
| 4 | 2 | Female + Male | -5.98 (-8.02, -3.94)   |
|   |   | Female Only   | 0.03 (-3.11, 3.17)     |
|   |   | Male Only     | 0.03 (-4.4, 4.46)      |
|   | 3 | Female + Male | 0.03 (-1.77, 1.84)     |
|   |   | Female Only   | -0.69 (-7.29, 5.9)     |
|   |   | Male Only     | -0.7 (-4.2, 2.8)       |
|   | 1 | Female + Male | -0.69 (-3.18, 1.79)    |
|   |   | Female Only   | -4.49 (-7.03, -1.94)   |
|   |   | Male Only     | -9.24 (-10.31, -8.17)  |
| 5 | 2 | Female + Male | -6.86 (-8.67, -5.06)   |
|   |   | Female Only   | 1.55 (-2.53, 5.62)     |
|   |   | Male Only     | 2.05 (-4.39, 8.5)      |
|   | 3 | Female + Male | 1.80 (-0.74, 4.34)     |
|   |   | Female Only   | 2.12 (-5.49, 9.72)     |
|   |   | Male Only     | -0.91 (-3.96, 2.13)    |
|   | 1 | Female + Male | 0.60 (-2.30, 3.50)     |
|   |   | Female Only   | -5.29 (-10.63, 0.05)   |
|   |   | Male Only     | -11.05 (-11.91, -10.2) |
| 6 | 2 | Female + Male | -8.17 (-10.78, -5.56)  |
|   |   | Female Only   | 2.58 (-2.23, 7.39)     |
|   |   | Male Only     | 2.86 (-4.15, 9.86)     |
|   | 3 | Female + Male | 2.72 (-0.11, 5.55)     |
|   |   | Female Only   | 2.38 (-4.15, 8.91)     |
|   |   | Male Only     | -2.14 (-8.14, 3.85)    |
|   | 1 | Female + Male | 0.37 (-2.89, 3.63)     |
|   |   | Female Only   | 0.36 (-3.54, 4.26)     |
|   |   | Male Only     | -3.73 (-13.64, 6.18)   |
| 7 | 2 | Female + Male | -1.69 (-5.47, 2.10)    |
|   |   | Female Only   | 1.55 (-2.99, 6.1)      |
|   |   | Male Only     | -5.49 (-12.56, 1.58)   |
|   | 3 | Female + Male | -1.58 (-5.03, 1.87)    |
|   |   | Female Only   | -2.52 (-9.29, 4.24)    |
|   |   | Male Only     | -9.7 (-16.16, -3.24)   |
|   | 1 | Female + Male | -6.11 (-10.01, -2.21)  |
|   |   | Female Only   | -3.8 (-13.34, 5.75)    |
|   |   | Male Only     | -8.53 (-20.41, 3.34)   |
| 8 | 2 | Female + Male | -5.90 (-10.82, -0.98)  |
|   |   | Female Only   | -3.26 (-10.85, 4.32)   |
|   |   | Male Only     | -12.13 (-19.2, -5.06)  |
|   | 3 | Female + Male | -7.70 (-12.20, -3.19)  |
|   |   | Female        | -3.31 (-11.37, 4.75)   |
|   |   | Male          | -11.13 (-25.75, 3.49)  |

|                                                                                                                                                                                                                         |   |               |                        |
|-------------------------------------------------------------------------------------------------------------------------------------------------------------------------------------------------------------------------|---|---------------|------------------------|
| 9                                                                                                                                                                                                                       | 2 | Female + Male | -6.78 (-12.24, -1.33)  |
|                                                                                                                                                                                                                         |   | Female Only   | -2.97 (-9.39, 3.46)    |
|                                                                                                                                                                                                                         |   | Male Only     | -9.84 (-18.92, -0.76)  |
|                                                                                                                                                                                                                         | 3 | Female + Male | -6.40 (-10.73, -2.08)  |
|                                                                                                                                                                                                                         |   | Female Only   | -3.34 (-9.78, 3.11)    |
|                                                                                                                                                                                                                         |   | Male Only     | -9.8 (-23.49, 3.89)    |
| 11                                                                                                                                                                                                                      | 2 | Female + Male | -6.21 (-10.96, -1.46)  |
|                                                                                                                                                                                                                         |   | Female Only   | -1.9 (-6.34, 2.53)     |
|                                                                                                                                                                                                                         |   | Male Only     | -8.17 (-16.1, -0.25)   |
|                                                                                                                                                                                                                         | 3 | Female + Male | -5.04 (-8.69, -1.38)   |
|                                                                                                                                                                                                                         |   | Female Only   | -11.75 (-17.76, -5.74) |
|                                                                                                                                                                                                                         |   | Male Only     | -6.74 (-16.97, 3.48)   |
| 12                                                                                                                                                                                                                      | 2 | Female + Male | -9.53 (-13.34, -5.71)  |
|                                                                                                                                                                                                                         |   | Female Only   | 0.66 (-2.11, 3.43)     |
|                                                                                                                                                                                                                         |   | Male Only     | -2.22 (-9.7, 5.27)     |
|                                                                                                                                                                                                                         | 3 | Female + Male | -0.78 (-3.60, 2.04)    |
|                                                                                                                                                                                                                         |   | Female Only   | -0.58 (-7.22, 6.07)    |
|                                                                                                                                                                                                                         |   | Male Only     | -5.08 (-14.0, 3.85)    |
| 14                                                                                                                                                                                                                      | 2 | Female + Male | -2.57 (-6.26, 1.11)    |
|                                                                                                                                                                                                                         |   | Female Only   | 0.12 (-3.46, 3.71)     |
|                                                                                                                                                                                                                         |   | Male Only     | -0.48 (-4.72, 3.75)    |
|                                                                                                                                                                                                                         | 3 | Female + Male | -0.18 (-2.04, 1.68)    |
|                                                                                                                                                                                                                         |   | Female Only   | 1.73 (-6.33, 9.79)     |
|                                                                                                                                                                                                                         |   | Male Only     | -3.31 (-10.34, 3.72)   |
| 21                                                                                                                                                                                                                      | 2 | Female + Male | -0.51 (-4.40, 3.38)    |
|                                                                                                                                                                                                                         |   | Female Only   | 6.64 (3.68, 9.6)       |
|                                                                                                                                                                                                                         |   | Male Only     | 9.0 (0.47, 17.53)      |
|                                                                                                                                                                                                                         | 3 | Female + Male | 7.82 (4.72, 10.92)     |
|                                                                                                                                                                                                                         |   | Female Only   | 6.28 (-8.32, 20.88)    |
|                                                                                                                                                                                                                         |   | Male Only     | 6.18 (-5.16, 17.52)    |
| Female + Male                                                                                                                                                                                                           |   |               | 6.24 (0.10, 12.37)     |
| a 100 μL PBS (vehicle) qd X 5, i.p., beginning 22 ± 2 h after infection. b 100 mg/kg CHIKV-EIG qd X 5, i.p., beginning 5 ± 1 h after infection. c 100 mg/kg CHIKV-EIG qd X 5, i.p., beginning 22 ± 2 h after infection. |   |               |                        |

a 100  $\mu$ L PBS (vehicle) qd X 5, i.p., beginning 22  $\pm$  2 h after infection. b 100 mg/kg CHIKV-EIG qd X 5, i.p., beginning 5  $\pm$  1 h after infection. c 100 mg/kg CHIKV-EIG qd X 5, i.p., beginning 22  $\pm$  2 h after infection.

**Table S3.** Summary of percent change in right footpad swelling (from left footpad) at 5 dpi to 9 dpi in CHIKV infected immunocompetent DBA/1J mice by treatment group.

| Day | Treatment Group | n  | % Change in Right Footpad Swelling (From Left Footpad) |                                   |               |
|-----|-----------------|----|--------------------------------------------------------|-----------------------------------|---------------|
|     |                 |    | Mean (SD)                                              | Median<br>(25th, 75th Percentile) | Min, Max      |
| 5   | 1 <sup>a</sup>  | 10 | -1.635 (5.648)                                         | -3.56 (-5.07, -0.48)              | -7.45, 11.11  |
|     | 3 <sup>b</sup>  | 9  | 2.245 (5.545)                                          | 0.48 (-2.39, 5.77)                | -4.91, 11.43  |
|     | 5 <sup>c</sup>  | 10 | 3.193 (6.249)                                          | 2.56 (-1.37, 8.08)                | -6.05, 14.50  |
|     | 7 <sup>d</sup>  | 10 | 1.078 (6.846)                                          | 1.18 (-4.37, 2.38)                | -6.87, 17.81  |
|     | 9 <sup>e</sup>  | 10 | 20.588 (17.416)                                        | 24.89 (11.90, 32.37)              | -8.68, 48.69  |
|     | 11 <sup>f</sup> | 10 | 15.304 (12.433)                                        | 16.48 (8.60, 25.12)               | -7.49, 32.39  |
| 6   | 1               | 10 | 2.298 (4.435)                                          | 0.00 (0.00, 5.00)                 | -4.55, 9.09   |
|     | 3               | 9  | 3.989 (9.552)                                          | 4.35 (0.00, 10.00)                | -12.00, 19.05 |
|     | 5               | 10 | 2.304 (5.344)                                          | 2.27 (-1.32, 7.01)                | -5.44, 9.52   |
|     | 7               | 10 | -0.238 (5.285)                                         | -0.66 (-5.06, 2.13)               | -6.41, 8.33   |

|   |    |    |                 |                      |              |
|---|----|----|-----------------|----------------------|--------------|
|   | 9  | 10 | 4.654 (7.788)   | 0.86 (−0.90, 12.78)  | −3.56, 18.78 |
|   | 11 | 10 | 24.429 (16.292) | 18.17 (11.81, 42.68) | 4.44, 45.89  |
| 7 | 1  | 3  | 1.329 (4.916)   | 4.17 (−4.35, 4.17)   | −4.35, 4.17  |
|   | 3  | 2  | −4.348 (6.149)  | −4.35 (−8.70, 0.00)  | −8.70, 0.00  |
|   | 5  | 3  | 3.235 (6.913)   | 4.35 (−4.17, 9.52)   | −4.17, 9.52  |
|   | 7  | 3  | 0.000 (0.000)   | 0.00 (0.00, 0.00)    | 0.00, 0.00   |
|   | 9  | 3  | 19.769 (13.769) | 22.73 (4.76, 31.82)  | 4.76, 31.82  |
|   | 11 | 3  | 50.922 (10.462) | 54.55 (39.13, 59.09) | 39.13, 59.09 |
| 8 | 1  | 3  | 1.515 (2.624)   | 0.00 (0.00, 4.55)    | 0.00, 4.55   |
|   | 3  | 2  | −2.165 (9.795)  | −2.16 (−9.09, 4.76)  | −9.09, 4.76  |
|   | 5  | 3  | 9.596 (12.476)  | 14.29 (−4.55, 19.05) | −4.55, 19.05 |
|   | 7  | 3  | 4.414 (4.349)   | 4.55 (0.00, 8.70)    | 0.00, 8.70   |
|   | 9  | 3  | 50.412 (11.025) | 47.83 (40.91, 62.50) | 40.91, 62.50 |
|   | 11 | 3  | 21.465 (12.548) | 22.73 (8.33, 33.33)  | 8.33, 33.33  |
| 9 | 1  | 3  | 0.000 (0.000)   | 0.00 (0.00, 0.00)    | 0.00, 0.00   |
|   | 3  | 2  | 2.489 (9.948)   | 2.49 (−4.55, 9.52)   | −4.55, 9.52  |
|   | 5  | 3  | −4.282 (7.645)  | −8.70 (−8.70, 4.55)  | −8.70, 4.55  |
|   | 7  | 3  | 1.515 (2.624)   | 0.00 (0.00, 4.55)    | 0.00, 4.55   |
|   | 9  | 3  | 34.327 (17.264) | 26.09 (22.73, 54.17) | 22.73, 54.17 |
|   | 11 | 3  | 5.863 (6.621)   | 4.55 (0.00, 13.04)   | 0.00, 13.04  |

p.i. = post-infection; SD = standard deviation. a 100 mg/kg/d CHIKV-EIG qd X 5, i.p., beginning 4 h before infection. b 50 mg/kg/d CHIKV-EIG qd X 5, i.p., beginning 4 h before infection. c 25 mg/kg/d CHIKV-EIG qd X 5, i.p., beginning 4 h before infection. d 100 mg/kg/d CHIKV-EIG qd X 3, i.p., beginning 4 h before infection. e 2 mg/kg/d methotrexate qd X 5, s.c., beginning 1 day before infection. f 100  $\mu$ L PBS (vehicle) qd X 5, i.p., beginning 4 h before infection.

**Table S4.** Analysis of percent change in right footpad swelling (from left footpad) at 5 dpi and 6 dpi in CHIKV-EIG treated immunocompetent DBA/1J mice.

| Day | Treatment Group | Wilcoxon Rank-Sum Test <i>p</i> Value |                             |
|-----|-----------------|---------------------------------------|-----------------------------|
|     |                 | Versus Vehicle Control                | Versus Methotrexate Control |
| 5   | 1 <sup>a</sup>  | 0.006 *                               | 0.015 *                     |
|     | 3 <sup>b</sup>  | 0.025 *                               | 0.020 *                     |
|     | 5 <sup>c</sup>  | 0.031 *                               | 0.017 *                     |
|     | 7 <sup>d</sup>  | 0.021 *                               | 0.009 *                     |
| 6   | 1               | 0.970                                 | 0.001 *                     |
|     | 3               | 0.838                                 | 0.008 *                     |
|     | 5               | 0.677                                 | 0.001 *                     |
|     | 7               | 0.162                                 | <0.001 *                    |

\* Denotes significant *p*-value ( $\leq 0.05$ ). a 100 mg/kg/d CHIKV-EIG qd X 5, i.p., beginning 4 h before infection. b 50 mg/kg/d CHIKV-EIG qd X 5, i.p., beginning 4 h before infection. c 25 mg/kg/d CHIKV-EIG qd X 5, i.p., beginning 4 h before infection. d 100 mg/kg/d CHIKV-EIG qd X 3, i.p., beginning 4 h before infection.

**Table S5.** Summary statistics of cytokine levels at 6 dpi in right hind limb tissue cytokine levels in immunocompetent DBA/1J mice and comparison between CHIKV-EIG treatment groups and vehicle and methotrexate controls.

| Cytokine | Treatment Group | Mean (SD)       | Median<br>(25th, 75th percentile) | Min, Max     | Wilcoxon Rank-Sum Test |                 |
|----------|-----------------|-----------------|-----------------------------------|--------------|------------------------|-----------------|
|          |                 |                 |                                   |              | vs Vehicle             | Vs Methotrexate |
| GMCSF    | 1 <sup>a</sup>  | 20.717 (54.811) | 0.00 (0.00, 0.00)                 | 0.00, 145.02 | 0.391                  | 1.000           |
|          | 3 <sup>b</sup>  | 0.000 (0.000)   | 0.00 (0.00, 0.00)                 | 0.00, 0.00   | 1.000                  | 0.391           |
|          | 5 <sup>c</sup>  | 0.000 (0.000)   | 0.00 (0.00, 0.00)                 | 0.00, 0.00   | 1.000                  | 0.391           |

|              |                 |                        |                               |                     |        |        |
|--------------|-----------------|------------------------|-------------------------------|---------------------|--------|--------|
|              | 7 <sup>d</sup>  | 0.000 (0.000)          | 0.00 (0.00, 0.00)             | 0.00, 0.00          | 1.000  | 0.391  |
|              | 9 <sup>e</sup>  | 0.000 (0.000)          | 0.00 (0.00, 0.00)             | 0.00, 0.00          | --     | --     |
|              | 11 <sup>f</sup> | 0.774 (2.048)          | 0.00 (0.00, 0.00)             | 0.00, 5.42          | --     | --     |
| IFN $\gamma$ | 1               | 125.937 (40.193)       | 128.23 (87.16, 150.88)        | 68.76, 190.96       | 0.523  | 0.523  |
|              | 3               | 123.775 (20.436)       | 125.04 (117.96, 142.29)       | 82.87, 143.45       | 0.250  | 0.371  |
|              | 5               | 119.751 (29.265)       | 131.01 (91.15, 136.21)        | 74.43, 159.72       | 0.798  | 0.523  |
|              | 7               | 75.814 (6.689)         | 77.19 (72.67, 78.64)          | 63.15, 84.84        | 0.002* | 0.018* |
|              | 9               | 117.522 (16.300)       | 115.63 (105.63, 122.59)       | 95.24, 147.30       | --     | --     |
|              | 11              | 110.480 (24.099)       | 109.70 (83.32, 132.12)        | 75.78, 137.68       | --     | --     |
| IL10         | 1               | 102.453<br>(133.102)   | 17.10 (0.00, 188.36)          | 0.00, 336.72        | 0.229  | 0.642  |
|              | 3               | 77.480 (101.994)       | 0.00 (0.00, 153.97)           | 0.00, 245.72        | 0.372  | 1.000  |
|              | 5               | 99.388 (122.262)       | 76.08 (0.00, 186.35)          | 0.00, 334.37        | 0.133  | 0.513  |
|              | 7               | 22.622 (59.852)        | 0.00 (0.00, 0.00)             | 0.00, 158.35        | 0.722  | 0.180  |
|              | 9               | 23.040 (39.556)        | 0.00 (0.00, 73.63)            | 0.00, 87.65         | --     | --     |
|              | 11              | 45.418 (61.555)        | 27.84 (0.00, 81.60)           | 0.00, 167.52        | --     | --     |
| IL12p70      | 1               | 169.855 (45.912)       | 187.92 (127.64, 193.58)       | 86.60, 219.16       | 0.250  | 0.798  |
|              | 3               | 148.145 (24.442)       | 151.95 (147.49, 160.39)       | 96.83, 175.43       | 0.482  | 0.250  |
|              | 5               | 156.580 (34.342)       | 171.03 (128.89, 181.65)       | 91.64, 184.41       | 0.307  | 1.000  |
|              | 7               | 99.459 (17.726)        | 97.37 (91.64, 102.70)         | 77.76, 135.49       | 0.030* | 0.030* |
|              | 9               | 143.567 (34.775)       | 149.09 (126.20, 158.26)       | 81.46, 196.44       | --     | --     |
|              | 11              | 168.940 (55.993)       | 166.05 (114.90, 226.91)       | 88.97, 246.32       | --     | --     |
| IL17         | 1               | 18.568 (45.699)        | 0.00 (0.00, 7.99)             | 0.00, 121.98        | 0.936  | 0.594  |
|              | 3               | 0.000 (0.000)          | 0.00 (0.00, 0.00)             | 0.00, 0.00          | 0.173  | 0.391  |
|              | 5               | 0.000 (0.000)          | 0.00 (0.00, 0.00)             | 0.00, 0.00          | 0.173  | 0.391  |
|              | 7               | 0.000 (0.000)          | 0.00 (0.00, 0.00)             | 0.00, 0.00          | 0.173  | 0.391  |
|              | 9               | 3.656 (9.414)          | 0.00 (0.00, 0.59)             | 0.00, 25.00         | --     | --     |
|              | 11              | 2.142 (5.666)          | 0.00 (0.00, 0.00)             | 0.00, 14.99         | --     | --     |
| IL1a         | 1               | 3920.307<br>(1903.751) | 4165.18 (2868.63,<br>5284.86) | 529.98,<br>6250.17  | 0.523  | 0.898  |
|              | 3               | 5521.166<br>(1690.683) | 5792.18 (4399.35,<br>7121.65) | 2895.17,<br>7750.56 | 0.055  | 0.160  |
|              | 5               | 3715.351<br>(1197.770) | 3015.20 (2908.35,<br>4451.52) | 2572.84,<br>5918.00 | 0.609  | 0.898  |
|              | 7               | 2548.967<br>(950.348)  | 2380.09 (1872.76,<br>2745.72) | 1767.11,<br>4556.69 | 0.125  | 0.25   |
|              | 9               | 3773.296<br>(1884.169) | 3467.39 (2455.56,<br>3996.84) | 2147.15,<br>7718.30 | --     | --     |
|              | 11              | 3877.762<br>(1808.493) | 4836.24 (1649.27,<br>5269.20) | 1576.16,<br>5939.99 | --     | --     |
| IL1b         | 1               | 157.959 (40.677)       | 160.92 (134.75, 194.64)       | 85.52, 202.61       | 0.798  | 0.798  |
|              | 3               | 163.063 (34.780)       | 173.20 (142.44, 187.74)       | 94.96, 195.10       | 0.443  | 0.701  |
|              | 5               | 195.598 (61.430)       | 202.33 (142.44, 255.27)       | 95.87, 256.47       | 0.125  | 0.160  |
|              | 7               | 98.453 (19.975)        | 91.51 (83.88, 109.20)         | 78.29, 137.67       | 0.015* | 0.084  |
|              | 9               | 152.341 (34.745)       | 159.57 (130.36, 184.73)       | 93.71, 194.92       | --     | --     |
|              | 11              | 145.542 (50.605)       | 167.03 (91.51, 190.32)        | 78.64, 203.76       | --     | --     |
| IL2          | 1               | 6.656 (12.414)         | 0.00 (0.00, 14.65)            | 0.00, 31.94         | 0.722  | 0.722  |
|              | 3               | 14.931 (23.047)        | 0.00 (0.00, 24.38)            | 0.00, 61.77         | 0.337  | 0.424  |
|              | 5               | 2.887 (7.639)          | 0.00 (0.00, 0.00)             | 0.00, 20.21         | 1.000  | 1.000  |
|              | 7               | 0.000 (0.000)          | 0.00 (0.00, 0.00)             | 0.00, 0.00          | 0.391  | 0.391  |
|              | 9               | 7.300 (19.315)         | 0.00 (0.00, 0.00)             | 0.00, 51.10         | --     | --     |
|              | 11              | 13.172 (34.849)        | 0.00 (0.00, 0.00)             | 0.00, 92.20         | --     | --     |

|              |    |                       |                         |                |         |         |
|--------------|----|-----------------------|-------------------------|----------------|---------|---------|
| IL3          | 1  | 67.514 (18.788)       | 66.47 (56.29, 81.17)    | 33.87, 89.92   | 0.898   | 0.250   |
|              | 3  | 68.173 (13.759)       | 72.76 (64.35, 77.76)    | 39.62, 78.45   | 0.701   | 0.160   |
|              | 5  | 65.490 (24.156)       | 63.13 (41.68, 72.31)    | 38.18, 111.27  | 1.000   | 0.482   |
|              | 7  | 41.479 (4.208)        | 41.18 (39.62, 44.22)    | 35.00, 48.68   | 0.030 * | 0.523   |
|              | 9  | 67.407 (21.927)       | 65.92 (54.52, 81.96)    | 33.33, 103.20  | --      | --      |
|              | 11 | 54.798 (19.205)       | 52.76 (37.72, 76.03)    | 32.81, 77.60   | --      | --      |
| IL4          | 1  | 61.200 (18.187)       | 62.70 (51.91, 79.00)    | 27.35, 81.80   | 0.097   | 0.055   |
|              | 3  | 48.214 (7.590)        | 49.87 (47.99, 52.99)    | 32.00, 54.88   | 0.798   | 0.898   |
|              | 5  | 54.154 (17.839)       | 52.79 (43.85, 55.41)    | 30.84, 89.55   | 0.443   | 0.749   |
|              | 7  | 30.756 (1.680)        | 30.84 (29.24, 32.00)    | 28.27, 33.25   | 0.030 * | 0.084   |
|              | 9  | 49.105 (14.004)       | 48.96 (42.80, 54.62)    | 26.92, 73.69   | --      | --      |
|              | 11 | 45.764 (14.253)       | 47.93 (30.84, 60.16)    | 26.50, 60.17   | --      | --      |
| IL5          | 1  | 142.396 (36.042)      | 153.11 (98.32, 172.96)  | 88.81, 177.39  | 1.000   | 0.523   |
|              | 3  | 157.817 (24.655)      | 164.06 (155.82, 172.05) | 103.89, 174.88 | 0.443   | 0.097   |
|              | 5  | 160.181 (49.235)      | 167.00 (100.11, 197.19) | 98.32, 227.86  | 0.898   | 0.337   |
|              | 7  | 107.396 (27.942)      | 100.11 (91.77, 107.96)  | 83.42, 168.23  | 0.073   | 0.482   |
|              | 9  | 158.177 (44.612)      | 152.94 (135.39, 211.73) | 87.40, 216.71  | --      | --      |
|              | 11 | 143.066 (71.313)      | 126.50 (86.03, 161.93)  | 84.71, 288.93  | --      | --      |
| IL6          | 1  | 69.056 (17.820)       | 73.38 (55.25, 77.88)    | 41.03, 96.62   | 0.522   | 0.798   |
|              | 3  | 71.961 (11.116)       | 74.82 (72.00, 79.50)    | 48.00, 81.08   | 0.084   | 0.481   |
|              | 5  | 84.762 (23.765)       | 83.62 (72.00, 94.95)    | 46.25, 125.04  | 0.041 * | 0.201   |
|              | 7  | 59.162 (29.948)       | 48.00 (42.40, 61.09)    | 38.55, 125.04  | 0.125   | 0.030 * |
|              | 9  | 66.108 (12.038)       | 70.67 (62.56, 74.28)    | 40.38, 74.82   | --      | --      |
|              | 11 | 74.243 (12.529)       | 71.67 (66.36, 76.00)    | 62.23, 100.48  | --      | --      |
| MCP1         | 1  | 42.941 (14.645)       | 41.93 (34.24, 46.36)    | 22.10, 70.16   | 0.003 * | 0.002 * |
|              | 3  | 124.345<br>(185.652)  | 52.91 (41.16, 73.43)    | 40.28, 544.33  | 0.055   | 0.030 * |
|              | 5  | 47.151 (23.062)       | 39.04 (36.82, 47.56)    | 24.46, 96.48   | 0.005 * | 0.002 * |
|              | 7  | 52.455 (61.163)       | 26.86 (25.85, 45.70)    | 24.46, 190.17  | 0.021 * | 0.005 * |
|              | 9  | 151.587 (75.680)      | 154.49 (91.17, 169.41)  | 54.90, 295.74  | --      | --      |
|              | 11 | 286.985<br>(124.803)  | 286.91 (187.82, 440.06) | 129.56, 447.13 | --      | --      |
| MIP1a        | 1  | 92.162 (243.837)      | 0.00 (0.00, 0.00)       | 0.00, 645.13   | 1.000   | 1.000   |
|              | 3  | 11.278 (22.547)       | 0.00 (0.00, 19.17)      | 0.00, 59.77    | 0.594   | 0.477   |
|              | 5  | 17.817 (26.403)       | 0.00 (0.00, 36.93)      | 0.00, 68.26    | 0.200   | 0.200   |
|              | 7  | 0.000 (0.000)         | 0.00 (0.00, 0.00)       | 0.00, 0.00     | 0.391   | 0.391   |
|              | 9  | 2.741 (7.251)         | 0.00 (0.00, 0.00)       | 0.00, 19.19    | --      | --      |
|              | 11 | 2.692 (7.122)         | 0.00 (0.00, 0.00)       | 0.00, 18.84    | --      | --      |
| RANTES       | 1  | 26.707 (62.312)       | 0.00 (0.00, 19.94)      | 0.00, 167.01   | 0.019 * | 0.006 * |
|              | 3  | 34.377 (42.678)       | 17.58 (0.00, 88.76)     | 0.00, 98.74    | 0.040 * | 0.005 * |
|              | 5  | 59.635 (23.654)       | 59.09 (40.28, 88.39)    | 30.68, 89.54   | 0.250   | 0.007 * |
|              | 7  | 726.037<br>(1848.792) | 23.57 (0.00, 83.96)     | 0.00, 4918.20  | 0.125   | 0.041 * |
|              | 9  | 156.005<br>(162.435)  | 90.68 (46.79, 311.21)   | 19.03, 451.27  | --      | --      |
|              | 11 | 160.056 (56.369)      | 176.47 (130.71, 193.49) | 62.38, 240.15  | --      | --      |
| TNF $\alpha$ | 1  | 54.051 (28.722)       | 49.98 (41.65, 68.34)    | 11.97, 106.59  | 0.609   | 0.201   |
|              | 3  | 39.885 (17.517)       | 30.44 (26.04, 53.45)    | 22.58, 69.90   | 0.609   | 0.523   |
|              | 5  | 57.227 (18.711)       | 51.87 (43.36, 76.53)    | 29.96, 80.30   | 0.307   | 0.125   |
|              | 7  | 138.426<br>(265.366)  | 33.66 (13.25, 90.61)    | 12.37, 736.87  | 0.798   | 0.898   |
|              | 9  | 53.565 (36.467)       | 46.68 (31.33, 51.28)    | 22.46, 132.94  | --      | --      |

|    |                 |                      |               |    |    |
|----|-----------------|----------------------|---------------|----|----|
| 11 | 39.505 (29.853) | 30.86 (17.48, 45.81) | 16.53, 101.38 | -- | -- |
|----|-----------------|----------------------|---------------|----|----|

---

\* Denotes significant p-value ( $\leq 0.05$ ). p-values are not adjusted for multiple comparisons. a 100 mg/kg/d CHIKV-EIG qd X 5, i.p., beginning 4 h before infection. b 50 mg/kg/d CHIKV-EIG qd X 5, i.p., beginning 4 h before infection. c 25 mg/kg/d CHIKV-EIG qd X 5, i.p., beginning 4 h before infection. d 100 mg/kg/d CHIKV-EIG qd X 3, i.p., beginning 4 h before infection. e 2 mg/kg/d methotrexate qd X 5, s.c., beginning 1 day before infection. f 100  $\mu$ L PBS (vehicle) qd X 5, i.p., beginning 4 h before infection.
